# Supplementary material
Source: Frontiers journal article supplement (https://www.frontiersin.org/articles/550184)
Supplement: Data_Sheet_1.PDF [file Data_Sheet_1.PDF]

**Table 1. Serum Biomarkers**

| Study                | Inclusion                                                                                                                       | Subtype                                                                                                                                                       | Control group                    | Duration of follow-up                          | Change in biomarker                                                                                                                                         | Sensitivity | Specificity | Correlation with Course                                                                                                                                     |
|----------------------|---------------------------------------------------------------------------------------------------------------------------------|---------------------------------------------------------------------------------------------------------------------------------------------------------------|----------------------------------|------------------------------------------------|-------------------------------------------------------------------------------------------------------------------------------------------------------------|-------------|-------------|-------------------------------------------------------------------------------------------------------------------------------------------------------------|
| <b>ACE</b>           |                                                                                                                                 |                                                                                                                                                               |                                  |                                                |                                                                                                                                                             |             |             |                                                                                                                                                             |
| Vorselaars 2015 (21) | (n=114) sarcoidosis patients started on second-line treatment with methotrexate. ACE was measured before and after methotrexate | (n=76) Patients with pulmonary treatment indication; (n=38) Patients with extrapulmonary treatment indication.                                                |                                  | 6 months                                       | Mean ACE decreased from 71.4 U/L to 54.2 U/L                                                                                                                |             |             | In patients with pulmonary treatment indication, ACE correlated with $\Delta$ VC, $\Delta$ FEV1, and $\Delta$ DLCO after methotrexate therapy               |
| Kruit, 2007 (19)     | (n=89) sarcoidosis patients                                                                                                     | (n=51) Patients normalized or improved to stage I; (n=21) Patients with persistent stage II/III; (n=12) Patients developing fibrosis                          |                                  | Median duration of 10 years (range 1-27 years) | The DD group exhibited ACE levels that reached twice the value of that of the II group, whereas intermediate values were observed in the ID group.          |             |             | ACE levels need to be correlated for I/D genotype. I/D allele frequencies can differ vastly between ethnicities.                                            |
| Lopes, 2019 (20)     | (n=46) sarcoidosis patients                                                                                                     | (n=27) sarcoidosis patients had active disease and (n=19) patients were in remission                                                                          |                                  | 2 years                                        | ACE concentrations were 341.18 ng/ml in control group, 337.866 ng/ml in sarcoidosis remission group and 470.96 ng/ml in active sarcoidosis group            | 88%         | 47%         | Highest ACE levels were seen in patients at stages 0, 1, and 2.                                                                                             |
| Kahkouee, 2016 (13)  | (n=148) Sarcoidosis patients diagnosed in accordance with ATS/ERS/WA SOG criteria                                               | Pulmonary sarcoidosis                                                                                                                                         |                                  | 3 years                                        | There was a reverse correlation between chronicity and ACE level                                                                                            |             |             | Chronicity of sarcoidosis according to patients' HRCT presentations is inversely related to their ACE level                                                 |
| Lieberman, 1975 (14) | (n=28) Sarcoidosis patients with active disease                                                                                 |                                                                                                                                                               | (n=200) Healthy controls         |                                                | Serum ACE activity is both age and sex dependent; its activity is greater in men than in women of comparable age, and higher in those below 20 years of age |             |             | Determination of serum ACE activity should be useful for confirming a diagnosis of sarcoidosis and as a guide for determining the effectiveness of therapy. |
| Brice, 1995 (15)     | (n=133) patients suffering from a variety of respiratory diseases                                                               | (n=51) sarcoidosis patients; (n=21) silicosis patients; (n=20) MTB patients; (n=12) cavitary tuberculosis patients; (n=26) COPD patients; (n=7) IPF patients. | (n=32) normal control volunteers |                                                | Significantly elevated levels of ACE were found in MTB, silicosis and sarcoidosis groups                                                                    |             |             | Serum levels reflect the total granulomatous load                                                                                                           |
| Studdy, 1978 (17)    | (n=90) Sarcoidosis patients                                                                                                     |                                                                                                                                                               | (n=80) healthy controls          |                                                | sarcoidosis patients who were not being treated with steroids had significantly                                                                             |             |             | ACE assays provide useful information on the course of sarcoidosis and response to steroid treatment.                                                       |

|                        |                                                                   |                                                                                                                     |                                                   |                                     |                                                                                                                                             |       |     |                                                                                                                                                                |
|------------------------|-------------------------------------------------------------------|---------------------------------------------------------------------------------------------------------------------|---------------------------------------------------|-------------------------------------|---------------------------------------------------------------------------------------------------------------------------------------------|-------|-----|----------------------------------------------------------------------------------------------------------------------------------------------------------------|
|                        |                                                                   |                                                                                                                     |                                                   |                                     | higher ACE activity than treated patients                                                                                                   |       |     |                                                                                                                                                                |
| Krasowski, 2015 (23)   | (n=1292) patients with sACE levels measured between 2009 and 2015 | (n=108) patients received ACE inhibitors                                                                            |                                                   | 54 months                           | ACE levels measured in patients receiving ACEI therapy were substantially lower.                                                            |       |     | The use of ACE level to screen for sarcoidosis may result in missed or delayed diagnosis                                                                       |
| <b>Lysozyme</b>        |                                                                   |                                                                                                                     |                                                   |                                     |                                                                                                                                             |       |     |                                                                                                                                                                |
| Bergantini, 2019 (25)  | (n=74) sarcoidosis patients                                       | Persistent chronic disease                                                                                          |                                                   | 2 years                             | Lysozyme serum levels were elevated in 78% of sarcoidosis patients                                                                          |       |     | Elevated lysozyme serum levels positively correlated with elevated KL-6 levels (r=0.35; p=0.004)                                                               |
| Tomita, 1999 (26)      | (n=110) sarcoidosis patients from central Japan                   |                                                                                                                     | (n=30) Controls with other granulomatous diseases | 5 years (n=41) sarcoidosis patients | In sarcoidosis patients mean serum lysozyme value was 15.7 ± 7.0 (µg/ml) while in controls mean serum lysozyme value was 11.0 ± 6.6 (µg/ml) | 79.1% |     | The maximum serum lysozyme level had a tendency to increase significantly according to the number of organs involved                                           |
| <b>Neopterin</b>       |                                                                   |                                                                                                                     |                                                   |                                     |                                                                                                                                             |       |     |                                                                                                                                                                |
| Gelissen, 2018 (28)    | (n=59) sarcoidosis patients affected by chronic sarcoidosis       | (n=20) Patients in active phase; (n=39) patients in inactive phase                                                  | (n=25) Healthy controls                           |                                     |                                                                                                                                             | 88.1% | 76% | While neopterin levels were increased in sarcoidosis patients in comparison to healthy controls, no differences were found between active and inactive disease |
| Ziegenhagen, 2003 (29) | (n=74) patients newly diagnosed with sarcoidosis                  | (n=10) Patients with Löfgren's syndrome; (n=51) with stable disease; (n=13) with active disease requiring treatment |                                                   | 6 months                            | Neopterin levels were slightly increased in sarcoidosis group                                                                               |       |     | Neopterin levels were significantly increased in patients with active/progressive disease                                                                      |
| <b>YKL40</b>           |                                                                   |                                                                                                                     |                                                   |                                     |                                                                                                                                             |       |     |                                                                                                                                                                |
| Johansen, 2005 (33)    | (n=27) Sarcoidosis patients with histological diagnosis           |                                                                                                                     | (n=173) healthy age-matched controls              |                                     | Median serum YKL-40 levels were 420 µg/l (range 106–1000) in sarcoidosis patients and 100 µg/l (range 60–214 µg/l) in healthy controls      |       |     | Patients with highest serum YKL-40 levels had lower DLCO/VA                                                                                                    |
| Gelissen, 2018 (28)    | (n=59) Sarcoidosis patients affected by chronic sarcoidosis       | (n=20) Patients in active phase; (n=39) in inactive phase                                                           | (n=25) Healthy controls                           |                                     |                                                                                                                                             | 83.1% | 92% | YKL-40 serum levels are elevated in patients with active sarcoidosis compared to inactive sarcoidosis                                                          |
| <b>sCD163</b>          |                                                                   |                                                                                                                     |                                                   |                                     |                                                                                                                                             |       |     |                                                                                                                                                                |
| Tanimura, 2015 (36)    | (n=40) Sarcoidosis patients and healthy controls                  | (n=20) Sarcoidosis patients                                                                                         | (n=20) Healthy controls                           |                                     | Mean sCD163 serum levels were significantly higher in sarcoidosis patients (1638 ± 134.8 ng/ml vs 550.6 ± 59.7 ng/ml in healthy controls)   |       |     |                                                                                                                                                                |
| <b>CCL18</b>           |                                                                   |                                                                                                                     |                                                   |                                     |                                                                                                                                             |       |     |                                                                                                                                                                |

|                           |                                                                                                                                  |                                                                                                                |                         |              |                                                                                                                                                             |      |      |                                                                                                                                                                                                                                                  |
|---------------------------|----------------------------------------------------------------------------------------------------------------------------------|----------------------------------------------------------------------------------------------------------------|-------------------------|--------------|-------------------------------------------------------------------------------------------------------------------------------------------------------------|------|------|--------------------------------------------------------------------------------------------------------------------------------------------------------------------------------------------------------------------------------------------------|
| Cai, 2013 (82)            | (n=199) patients with interstitial lung diseases                                                                                 | (n=54) IPF; (n=30) iNSIP; (n=11) RB-ILD/DIP; (n=26) COP; (n=34) HP; (n=44) sarcoidosis                         | (n=61) Healthy controls |              | CCL18 serum levels were significantly elevated in sarcoidosis patients: 108 ng/ml (IQR 67 ng/ml), in comparison to healthy controls 39 ng/ml (IQR 44 ng/ml) |      |      | No differences in CCL18 serum levels found between different radiological stages                                                                                                                                                                 |
| Boot, 2010 (38)           | (n=34) sarcoidosis patients with histologically proven sarcoidosis                                                               | (n=18) Patients with extended disease; (n=16) Patients with limited disease                                    |                         | 16-25 months | CCL18 serum levels were elevated in sarcoidosis patients: median 259 ng/ml, range 71–1082 ng/ml; normal range 10–72 ng/ml                                   | 93%  |      |                                                                                                                                                                                                                                                  |
| <b>CTO</b>                |                                                                                                                                  |                                                                                                                |                         |              |                                                                                                                                                             |      |      |                                                                                                                                                                                                                                                  |
| Boot, 2010 (38)           | (n=34) sarcoidosis patients with histologically proven sarcoidosis                                                               | (n=18) Patients with extended disease; (n=16) Patients with limited disease                                    |                         | 16-25 months | CTO serum levels were elevated in all sarcoidosis patients: median 577 nmol/ml h, range 74–3032 nmol/ml h; normal median 42 nmol/ml h, range <70 nmol/ml h  | 100% |      |                                                                                                                                                                                                                                                  |
| Lopes, 2019 (20)          | (n=46) sarcoidosis patients                                                                                                      | (n=27) sarcoidosis patients with active disease; (n=19) patients in remission                                  |                         | 2 years      | Mean serum CTO activities were 65.55 U/ml in control group, 38.096 U/ml in sarcoidosis remission group and 297.11 U/ml in active sarcoidosis group          | 55%  | 100% | mean CTO activity was higher in patients with active disease than in controls or patients in remission                                                                                                                                           |
| <b>sIL-2R</b>             |                                                                                                                                  |                                                                                                                |                         |              |                                                                                                                                                             |      |      |                                                                                                                                                                                                                                                  |
| Vorselaars, 2015 (21)     | (n=114) sarcoidosis patients started on second-line treatment with methotrexate. sACE was measured before and after methotrexate | (n=76) patients with pulmonary treatment indication; (n=38) patients with extrapulmonary treatment indication. |                         | 6 months     | Mean sIL-2R decreased from 4840 pg/ml to 2290 pg/ml                                                                                                         |      |      | Significant correlation was found between $\Delta$ sIL-2R and $\Delta$ FVC, $\Delta$ DLCO after methotrexate therapy in patients with a pulmonary treatment indication                                                                           |
| Grutters, 2003 (61)       | (n=14) Diagnosis was confirmed by histologic evidence.                                                                           | All patients had active disease                                                                                |                         | 2 years      |                                                                                                                                                             |      |      | Positive correlation between change in sIL-2R and change in radiographic stage, which remained significant after correction for treatment. The initial sIL-2R level correlated inversely with the extent of change in the follow-up sIL-3r level |
| Ogata-suetsugu, 2017 (83) | (n=67) newly diagnosed sarcoidosis patients                                                                                      | (n=52) Patients were observed by chest radiography                                                             |                         | 37 months    | Serum sIL-2R values were elevated in 45.9% of sarcoidosis patients. Mean $818.8 \pm 453.1$                                                                  |      |      | Serum sIL-2R levels in patients with pulmonary scadding stages II and III were significantly higher than stage 0 and I                                                                                                                           |

|                          |                                                            |                                                                                    |                                              |                    |                                                                                                                                                                                                            |  |  |                                                                                                                |
|--------------------------|------------------------------------------------------------|------------------------------------------------------------------------------------|----------------------------------------------|--------------------|------------------------------------------------------------------------------------------------------------------------------------------------------------------------------------------------------------|--|--|----------------------------------------------------------------------------------------------------------------|
|                          |                                                            |                                                                                    |                                              |                    | U/ml (normal <206 U/ml)                                                                                                                                                                                    |  |  |                                                                                                                |
| Vorselaars, 2014 (59)    | (n=47) sarcoidosis patients who started infliximab therapy |                                                                                    |                                              | 36.6 ± 22.6 months | Serum sIL-2R concentrations of ≥4000 pg·mL <sup>-1</sup> at the start of therapy were found to predict relapse                                                                                             |  |  |                                                                                                                |
| <b>BAFF</b>              |                                                            |                                                                                    |                                              |                    |                                                                                                                                                                                                            |  |  |                                                                                                                |
| Ando, 2018 (64)          | (n=88) sarcoidosis patients                                | Pulmonary sarcoidosis                                                              | (n=21) Healthy controls                      |                    | Median BAFF serum levels in sarcoidosis patients were elevated (1553.0 pg/ml, range 535.0-7958.0) in comparison to healthy controls (984.6 pg/ml, range 585.0-1234.1)                                      |  |  | Serum BAFF levels show a positive correlation with extrapulmonary involvement                                  |
| Saussine, 2012 (65)      | (n=33) sarcoidosis patients                                | (n=18) Patients with active sarcoidosis; (n=15) patients with inactive sarcoidosis | (n=18) Healthy controls                      |                    | BAFF serum levels in patients with active sarcoidosis (2343 ± 1079 pg/ml) were significantly higher than in patients with inactive sarcoidosis (1239 ± 376 pg/ml) and healthy controls (1352 ± 526 pg/ml). |  |  |                                                                                                                |
| Ueda-Hayakawa, 2013 (66) | (n=37) sarcoidosis patients                                |                                                                                    | (n=21) Healthy controls                      |                    | Serum BAFF levels were significantly higher in sarcoidosis patients (1.59 ± 0.92 ng/ml) than in healthy controls (0.97 ± 0.21 ng/ml)                                                                       |  |  | The frequency of skin and eye involvement was significantly higher in patients with elevated BAFF serum levels |
| <b>B-cells</b>           |                                                            |                                                                                    |                                              |                    |                                                                                                                                                                                                            |  |  |                                                                                                                |
| Lee, 2011 (69)           | (n=22) sarcoidosis patients with biopsy-proven sarcoidosis | Patients with severe chronic sarcoidosis                                           |                                              |                    | Memory B-cells were significantly reduced in sarcoidosis patients                                                                                                                                          |  |  |                                                                                                                |
| Kudryavtsev, 2020 (62)   | (n=37) sarcoidosis patients with stage II sarcoidosis      | Pulmonary sarcoidosis                                                              | (n=35) Sex- and age-matched healthy controls |                    | The frequency of CD19+ B-cells was higher in sarcoidosis patients, memory B-cells were decreased and activated naïve B-cells were increased in sarcoidosis patients                                        |  |  |                                                                                                                |
| Kamphuis, 2013 (70)      | (n=32) sarcoidosis patients                                |                                                                                    |                                              |                    | CD271 memory B-cells were significantly reduced in sarcoidosis patients while total B-cell                                                                                                                 |  |  |                                                                                                                |

|                        |                                                       |                                                                                    |                                              |  |                                                                                                                                   |  |  |  |
|------------------------|-------------------------------------------------------|------------------------------------------------------------------------------------|----------------------------------------------|--|-----------------------------------------------------------------------------------------------------------------------------------|--|--|--|
|                        |                                                       |                                                                                    |                                              |  | numbers were not affected                                                                                                         |  |  |  |
| <b>Bregs</b>           |                                                       |                                                                                    |                                              |  |                                                                                                                                   |  |  |  |
| Saussine, 2012 (65)    | (n=33) sarcoidosis patients                           | (n=18) Patients with active sarcoidosis; (n=15) patients with inactive sarcoidosis | (n=18) Healthy controls                      |  | Patients with active sarcoidosis had increased numbers of IL-10 producing Bregs compared to inactive disease and healthy controls |  |  |  |
| Kudryavtsev, 2020 (62) | (n=37) sarcoidosis patients with stage II sarcoidosis | Pulmonary sarcoidosis                                                              | (n=35) Sex- and age-matched healthy controls |  | Sarcoidosis patients have increased percentages of regulatory B-cells                                                             |  |  |  |
