# Supplementary material
Source: Frontiers journal article supplement (https://www.frontiersin.org/articles/550184)
Supplement: Data_Sheet_2.PDF [file Data_Sheet_2.PDF]

**Table 2. BALF Biomarkers and cytokines**

| Study                        | Inclusion                                                                                     | Subtype                                                    | Control group                                                                                                                                                                  | Duration of follow-up     | Change in biomarker                                                                                              | Sensitivity | Specificity | Correlation with Course                                                                                                                  |
|------------------------------|-----------------------------------------------------------------------------------------------|------------------------------------------------------------|--------------------------------------------------------------------------------------------------------------------------------------------------------------------------------|---------------------------|------------------------------------------------------------------------------------------------------------------|-------------|-------------|------------------------------------------------------------------------------------------------------------------------------------------|
| <b>Lymphocytosis</b>         |                                                                                               |                                                            |                                                                                                                                                                                |                           |                                                                                                                  |             |             |                                                                                                                                          |
| Hyltgaard, 2012 (80)         | (n=18) Biopsy proven sarcoidosis patients                                                     |                                                            | (n=73) Patients with other pulmonary diseases                                                                                                                                  | 2 years                   | Elevated lymphocyte percentages in BALF in sarcoidosis patients compared to other pulmonary diseases             | 71%         | 68%         | BAL lymphocytosis is not a universal finding in sarcoidosis but proved useful for the diagnosis                                          |
| Tanriverdi, 2015 (79)        | (n=68) Biopsy proven sarcoidosis patients.                                                    | Sarcoidosis patients with diffuse parenchymal lung disease | (n=72) non-sarcoidosis patients with diffuse parenchymal lung disease: (n=20) CTD-ILD; (n=14) pneumoconiosis; (n=12) IPF; (n=5) infections; (n=16) other ILD; (n=4) malignancy | 10 years, retrospectively | BAL lymphocyte fraction was significantly higher in sarcoidosis than in non-sarcoidosis ILDs (20.6% to 6%)       | 85%         | 72%         | BAL lymphocyte fraction and CD4/CD8 ratio were 2.5 - 3 fold greater in sarcoidosis than in non-sarcoidosis ILD patients                  |
| <b>CD4/CD8 ratio</b>         |                                                                                               |                                                            |                                                                                                                                                                                |                           |                                                                                                                  |             |             |                                                                                                                                          |
| Ziegenhagen, 2003 (29)       | (n=74) Sarcoidosis patients diagnosed in accordance with ATS/ERS/WA SOG criteria              | Pulmonary sarcoidosis                                      | (n=48) Individuals who underwent bronchoscopy for diagnostic reasons and were retrospectively free of any infectious, inflammatory or malignant lung disease.                  | 6 months                  | The CD4/CD8 ratio was significantly increased in the sarcoidosis group compared to controls.                     |             |             | Although the BALF CD4/CD8 ratio may be useful in establishing a diagnosis of sarcoidosis, it did not reflect the severity of the disease |
| Hamsten, 2016 (78)           | (n=251) Sarcoidosis patients with active disease, diagnosis based on ATS/ERS/WA SOG criteria. | Pulmonary sarcoidosis                                      | (n=16) Healthy controls (never-smokers) with no respiratory infections                                                                                                         |                           |                                                                                                                  |             |             | For CD4/CD8 ratio no associations were observed between patients and controls                                                            |
| Tanriverdi, 2015 (79)        | (n=68) Biopsy proven sarcoidosis patients.                                                    | Sarcoidosis patients with diffuse parenchymal lung disease | (n=72) non-sarcoidosis patients with diffuse parenchymal lung disease: (n=20) CTD-ILD; (n=14) pneumoconiosis; (n=12) IPF; (n=5) infections; (n=16) other ILD; (n=4) malignancy |                           | Median CD4/CD8 ratio in BALF was significantly higher in sarcoidosis than in non-sarcoidosis ILDs (3.87 to 0.88) | 76%         | 79%         | BAL lymphocyte fraction and CD4/CD8 ratio were 2.5 - 3 fold greater in sarcoidosis than in non-sarcoidosis ILD patients                  |
| Hyltgaard, 2012 (80)         | (n=18) Biopsy proven sarcoidosis patients                                                     |                                                            | (n=73) Patients with other pulmonary diseases                                                                                                                                  | 2 years                   | Significantly elevated CD4/CD8 ratio in sarcoidosis patients compared to other pulmonary diseases                | 68%         | 73%         | The diagnosis of sarcoidosis is supported by an elevated CD4/CD8 ratio                                                                   |
| <b>CD103+CD4+/CD4+ ratio</b> |                                                                                               |                                                            |                                                                                                                                                                                |                           |                                                                                                                  |             |             |                                                                                                                                          |
| Kolopp-Sarda, 2000 (84)      | (n=18) patients with CD4 <sup>+</sup> lymphoc                                                 |                                                            | (n=16) patients with CD4 <sup>+</sup> lymphocyt                                                                                                                                |                           | The percentage of CD103                                                                                          |             |             |                                                                                                                                          |

|                        |                                                                                                        |                                                                                                                                  |                                                                                                                                                                                                                                                                                                                                         |           |                                                                                                                                                                                                            |     |     |  |
|------------------------|--------------------------------------------------------------------------------------------------------|----------------------------------------------------------------------------------------------------------------------------------|-----------------------------------------------------------------------------------------------------------------------------------------------------------------------------------------------------------------------------------------------------------------------------------------------------------------------------------------|-----------|------------------------------------------------------------------------------------------------------------------------------------------------------------------------------------------------------------|-----|-----|--|
|                        | ytosis and confirmed pulmonary sarcoidosis according to clinical, radiological, and pathology criteria |                                                                                                                                  | osis without sarcoidosis, (n=48) Patients without CD4 <sup>+</sup> lymphocytosis, (n=11) patients with normal BAL outcome (lymphocytes < 10%, polymorphonuclear cells < 5%)                                                                                                                                                             |           | expressing CD4+T-cells were significantly lower in the sarcoidosis group (9.5 ± 1.4%) compared to all other groups (33.8 ± 17.1%)                                                                          |     |     |  |
| Heron, 2008 (85)       | (n=55) Biopsy proven sarcoidosis patients                                                              |                                                                                                                                  | (n=1) Löfgren's syndrome, (n=22) Hypersensitivity pneumonitis, (n=8) IPF, (n=3) Other interstitial pneumonia, (n=13) Infection, (n=4) TBC, (n=8) Systemic disease, (n=6) Malignancy, (n=1) Non-hodgkin lymphoma, (n=1) multiple myeloma, (n=1) chronic lymphomatic leukemia, (n=3) other.                                               |           | Sarcoidosis patients showed a significantly lower CD103+CD4+/CD4+ ratio compared to patients with other ILDs (0.16±0.02 vs. 0.4± 0.03).                                                                    | 57% | 91% |  |
| Bretagne, 2016 (86)    | (n=53) Sarcoidosis patients with confirmed diagnosis                                                   | (n=22) by tissue biopsy, (n=25) by transbronchial needle aspiration or mediastinal lymph nodes, (n=6) typical Löfgrens syndrome. | (n=22) Tuberculosis, (n=36) other pulmonary infections, (n=6) HP, (n=14) NSIP, (n=9) OP, (n=19) drug-induced pneumonia, (n=21) other ILDs, (n=25) other diagnosis.                                                                                                                                                                      | 2.3 years | The CD103+CD4+/CD4+ ratio was significantly lower in sarcoidosis compared to NSIP, HP and other ILDs. However, its discriminative power to distinguish between sarcoidosis and all other diagnoses was low |     |     |  |
| Hyldengaard, 2012 (80) | (n=19) Sarcoidosis patients with biopsy confirmed diagnosis                                            | (n=11) Scadding stage 0/I, (n=8) scadding stage II/III                                                                           | (n=88) other pulmonary diseases, (n=12) EAA, (n=10) IPF, (n= 6) NSIP, (n=2) desquamative interstitial pneumonitis, (n=1) lymphocytic interstitial pneumonitis, (n=10) collagen vascular disease with interstitial lung disease, (n=26) unclassified interstitial lung disease, (n=2) tuberculosis, (n=1) aspergillosis and (n=18) other |           | No significant differences were detected in CD103+CD4+/CD4+ in BAL fluid between the patient groups                                                                                                        | 35% | 93% |  |

|                                      |                                                                                                                             |                                                                                               |                                                                                                                                   |           |                                                                                                                    |     |     |                                                                                                                                                                                                                      |
|--------------------------------------|-----------------------------------------------------------------------------------------------------------------------------|-----------------------------------------------------------------------------------------------|-----------------------------------------------------------------------------------------------------------------------------------|-----------|--------------------------------------------------------------------------------------------------------------------|-----|-----|----------------------------------------------------------------------------------------------------------------------------------------------------------------------------------------------------------------------|
|                                      |                                                                                                                             |                                                                                               | non-granulomatous lung diseases                                                                                                   |           |                                                                                                                    |     |     |                                                                                                                                                                                                                      |
| <b>CD4+ Vα2.3+ T-cells</b>           |                                                                                                                             |                                                                                               |                                                                                                                                   |           |                                                                                                                    |     |     |                                                                                                                                                                                                                      |
| Darlington, 2020 (83)                | (n=749) Sarcoidosis patients diagnosed in accordance with WASOG criteria                                                    | (n=274) patients with Löfgren's syndrome; (n=475) non-LS patients                             | (n=69) healthy volunteers; (n=39) patients with other pulmonary conditions                                                        |           | An increased proportion of CD4+ Vα2.3+ T-cells in BALF is highly specific for sarcoidosis                          | 97% | 36% | This T-cell subset could be used in addition to the CD4/CD8 ratio to support the sarcoidosis diagnosis, especially in LS                                                                                             |
| <b>Th17-cells</b>                    |                                                                                                                             |                                                                                               |                                                                                                                                   |           |                                                                                                                    |     |     |                                                                                                                                                                                                                      |
| Facco, 2010 (87)                     | (n=25) Biopsy proven sarcoidosis patients                                                                                   | Patients with pulmonary involvement                                                           | (n=10) Healthy controls                                                                                                           | 6 months  | High expression of Th17 (CCR6) in sarcoidosis patients                                                             |     |     | Th17 cells infiltrate sarcoid lung, localizing around and inside the granuloma, at the sites of disease activity, not only in the early phase, but also in the progression towards the fibrotic phase of the disease |
| Ramstein, 2016 (89)                  | (n=65) sarcoidosis patients                                                                                                 | (n=35) Sarcoidosis patients from U.S. cohort; (n=30) sarcoidosis patients from Erasmus cohort | (n=18) Healthy controls from U.S. Cohort; (n=12) healthy controls from Erasmus Cohort                                             |           | Numbers of Th17 cells were significantly increased in sarcoidosis patients compared to healthy controls            |     |     |                                                                                                                                                                                                                      |
| Broos, 2018 (3)                      | (n=55) Sarcoidosis patients donated BALF, mediastinal lymph nodes (MLNs)-derived fine needle aspiration or peripheral blood |                                                                                               | (n=22) Lung transplantation donors without signs of pulmonary inflammation                                                        |           | In sarcoidosis BALF, Th17.1 cell proportions were higher than either Th1, Th2, Th17 or CCR6+ double-positive cells |     |     | Th17 levels are highest in BALF compared to MLN                                                                                                                                                                      |
| <b>Treg</b>                          |                                                                                                                             |                                                                                               |                                                                                                                                   |           |                                                                                                                    |     |     |                                                                                                                                                                                                                      |
| Kachamakova - Trojanowska, 2018 (92) | (n=45) newly diagnosed treatment-naive sarcoidosis patients                                                                 | patients with pulmonary stage I and II                                                        | (n=35) Healthy controls                                                                                                           |           | Patients with pulmonary sarcoidosis have a high percentage of Tregs                                                |     |     |                                                                                                                                                                                                                      |
| <b>Neutrophils</b>                   |                                                                                                                             |                                                                                               |                                                                                                                                   |           |                                                                                                                    |     |     |                                                                                                                                                                                                                      |
| Tutor-Utora, 2006 (97)               | (n=33) Non-smoking sarcoidosis patients diagnosed in accordance with ATS/ERS/WASOG criteria                                 | Pulmonary sarcoidosis                                                                         |                                                                                                                                   | 31 months | Higher percentage of neutrophils in sarcoidosis patients with advanced disease                                     |     |     | Patients with a poor outcome had a significantly higher percentage of neutrophils                                                                                                                                    |
| Ziegenhagen, 2003 (29)               | (n=74) Sarcoidosis patients diagnosed in accordance with ATS/ERS/WASOG criteria                                             | Pulmonary sarcoidosis                                                                         | (n=48) Individuals who underwent bronchoscopy for diagnostic reasons and were free of any inflammatory or malignant lung disease. | 6 months  | A significant increase in the % BALF neutrophils in sarcoid patients with progressing disease compared to controls |     |     | The percentage of neutrophils in BALF is significantly elevated in sarcoidosis patients requiring systemic steroid therapy.                                                                                          |
| <b>NK-cells</b>                      |                                                                                                                             |                                                                                               |                                                                                                                                   |           |                                                                                                                    |     |     |                                                                                                                                                                                                                      |
| Tutor-utora, 2006 (97)               | (n=33) Non-smoking                                                                                                          | Pulmonary sarcoidosis                                                                         |                                                                                                                                   | 31 months | NK-cells in BALF were                                                                                              |     |     | Patients with a poor outcome                                                                                                                                                                                         |

|                              |                                                                                                   |                                                                                                                 |                                                                       |         |                                                                                                                                                                         |     |     |                                                                                                                                                                                                   |
|------------------------------|---------------------------------------------------------------------------------------------------|-----------------------------------------------------------------------------------------------------------------|-----------------------------------------------------------------------|---------|-------------------------------------------------------------------------------------------------------------------------------------------------------------------------|-----|-----|---------------------------------------------------------------------------------------------------------------------------------------------------------------------------------------------------|
|                              | sarcoidosis patients diagnosed in accordance with ATS/ERS/WA SOG criteria                         |                                                                                                                 |                                                                       |         | lower in patients at Stage I than in patients at Stage II and III                                                                                                       |     |     | and in need of corticosteroid treatment had a higher percentage of NK-cells                                                                                                                       |
| Bergantini, 2019 (98)        | (n=190) patients with sarcoidosis and other ILDs from 2015 to 2018                                | (n=115) sarcoidosis patients                                                                                    | (n=24) cHP patients; (n=32) IPF; (n=11) NSIP patients; (n=8) controls | 3 years | Lower NK-cell percentages were observed in sarcoidosis patients than in the other ILD groups (IPF and NSIP) (p<0.05)                                                    | 46% | 66% | Chronic granulomatous lung disorders (sarcoidosis and cHP) showed median NK percentages of <1.8%, in contrast with controls 2.4% and severe ILD (IPF and NSIP) 3%                                 |
| <b>NKT-cells</b>             |                                                                                                   |                                                                                                                 |                                                                       |         |                                                                                                                                                                         |     |     |                                                                                                                                                                                                   |
| Bergantini, 2019 (98)        | (n=190) patients with sarcoidosis and other ILDs from 2015 to 2018                                | (n=115) sarcoidosis patients                                                                                    | (n=24) cHP patients; (n=32) IPF; (n=11) NSIP patients; (n=8) controls | 3 years | Lower NKT-cell percentages were observed in sarcoidosis patients than in the other ILD groups (IPF and NSIP) (p<0.05)                                                   | 70% | 56% | Chronic granulomatous lung disorders (sarcoidosis and cHP) showed median percentages of NKT-cells of 4.8%, 5.7% in controls and 6.2% in other ILDs (IPF and NSIP).                                |
| Kobayashi, 2004 (101)        | (n=43) sarcoidosis patients with no history of using steroids or other anti-inflammatory drugs    | (n=30) Remitting; (n=13) non-remitting.                                                                         | (n=22) Normal controls                                                |         | Significantly lower levels of IFN- $\gamma$ producing NKT-cells in patients with non-remitting sarcoidosis compared to those with remitting disease and control samples |     |     | Dysfunction of NKT-cells contribute to the modulation of disease progression and the formation of non-caseating granulomas in sarcoidosis                                                         |
| Kobayashi, 2004 (101)        | (n=43) sarcoidosis patients with no history of using steroids or other anti-inflammatory drugs    | (n=30) Remitting; (n=13) non-remitting.                                                                         | (n=22) Normal controls                                                |         | Significantly higher number of NKT-cells among total T-cells in lymph nodes of sarcoidosis patients.                                                                    |     |     | Sarcoidosis involves an accumulation of NKT cells in granuloma lesions                                                                                                                            |
| Korosec, 2010 (102)          | (n=47) newly diagnosed, histologically confirmed sarcoidosis according to ATS/ERS/WA SOG criteria | Pulmonary sarcoidosis; (n=14) Lofgren patients; (n=15) Stage I; (n=28) stage II; (n=3) stage III (n=1) stage IV | (n=8) control subjects without any pulmonary morbidities              |         | Frequency of NKT cells were comparably low in both clinical categories of sarcoidosis patients; Lofgren's syndrome vs. other forms; 0.21% vs. 0.19%                     |     |     | There is a major pulmonary deficiency of NKT-cells in the lungs of newly identified, corticosteroid-naïve sarcoidosis patients, which is approximately 5 times lower compared to control subjects |
| <b>CXCL9, CXCL10, CXCL11</b> |                                                                                                   |                                                                                                                 |                                                                       |         |                                                                                                                                                                         |     |     |                                                                                                                                                                                                   |
| Arger, 2020 (106)            | (n=108) Sarcoidosis patients who met criteria established by ATS                                  |                                                                                                                 |                                                                       |         | Higher CXCL9 and CXCL10 levels in BALF, lung tissue and blood of sarcoidosis patients                                                                                   |     |     | Higher levels of CXCL10 were associated with lower FVC, TLC and DLCO values while higher CXCL9 levels were associated with                                                                        |

|                          |                                                                                      |                                                                              |                                                     |         |                                                                                                                                       |       |     |                                                                                                         |
|--------------------------|--------------------------------------------------------------------------------------|------------------------------------------------------------------------------|-----------------------------------------------------|---------|---------------------------------------------------------------------------------------------------------------------------------------|-------|-----|---------------------------------------------------------------------------------------------------------|
|                          |                                                                                      |                                                                              |                                                     |         |                                                                                                                                       |       |     | involvement of multiple organs                                                                          |
| Arger, 2019 (107)        | (n=104) Sarcoidosis subjects who met established ATS diagnostic criteria             |                                                                              | (n=49) Healthy controls from the Bay Area community | 5 years | CXCL11 is increased in BALF, alveolar macrophages and lung tissue in sarcoidosis patients                                             |       |     | CXCL11 levels were significantly increased in subjects with abnormal FVC, FEV1, and DLCO                |
| Busuttill, 2009 (105)    | (n=72) Sarcoidosis patients staged according to ATS/ERS/WA SOG criteria.             | Pulmonary sarcoidosis                                                        |                                                     |         | In sarcoidosis, CXCL9 levels were elevated compared to healthy controls                                                               |       |     | Sarcoid granulomas are made up of CXCR3-expressing lymphocytes and cells of monocyte lineage            |
| <b>KL-6</b>              |                                                                                      |                                                                              |                                                     |         |                                                                                                                                       |       |     |                                                                                                         |
| Kunitake, 2001 (113)     | (n=41) sarcoidosis patients with biopsy evidence                                     |                                                                              | (n=13) Healthy controls                             |         | KL-6 levels were elevated in BALF of sarcoidosis patients $280 \pm 212$ U/ml in comparison to healthy controls $137 \pm 61$ U/ml      |       |     |                                                                                                         |
| Janssen, 2003 (114)      | (n=79) Sarcoidosis patients with PA                                                  | (n=56) non-smokers, (n=23) smokers                                           | (n=38) Healthy controls                             | 2 years |                                                                                                                                       | 86%   | 84% | KL-6 levels were highest in stage II/III patients and/or patients with parenchymal infiltration         |
| Bergantini, 2019 (25)    | (n=74) sarcoidosis patients                                                          | Persistent chronic disease                                                   |                                                     | 2 years | KL-6 levels were elevated in sarcoidosis patients ( $573 \pm 480$ IU/ml) in comparison to healthy controls ( $267.7 \pm 147.7$ IU/ml) | 78%   | 73% | Elevated lysozyme serum levels positively correlated with elevated KL-6 levels ( $r=0.35$ ; $p=0.004$ ) |
| d'Alessandro, 2020 (115) | (n=100) Caucasian patients with ILD of suspected ILD                                 | (n=41) Pulmonary sarcoidosis patients, (n=11 cHP) patients, (n=24) other ILD | (n=24) patients with no ILD                         |         | KL-6 levels were significantly higher in sarcoidosis patients than in other ILD                                                       | 73%   | 69% | Elevated KL-6 levels correlated with CD4+/CD8+ ratio                                                    |
| Myiوشي, 2010 (77)        | (n=43) Pulmonary sarcoidosis patients diagnosed according to ATS/ERS/WA SOG criteria |                                                                              |                                                     | 2 years | Serum KL-6 levels significantly elevated in sarcoidosis patients with parenchymal infiltration                                        | 76.9% | 70% | KL-6 levels were predictive of increased parenchymal infiltration.                                      |
